# Supplementary material
Source: MDPI journal article supplement (https://www.mdpi.com/2073-4433/14/9/1440)
Supplement: s1 [file s1]

# Supplementary Materials:

Manas Khan <sup>1</sup>, Rabin Bhattarai <sup>1,\*</sup> and Liang Chen <sup>2</sup>

## Modified Mann-Kendall test

The null hypothesis for the Mann-Kendall test (Mann, 1945; Kendall, 1948) is that there is no trend in the data assuming the data are independent and randomly ordered. The Mann-Kendall test statistic  $S$  can be calculated as follows:

$$S = \sum_{i=1}^{n-1} \sum_{j=i+1}^n \text{sgn}(x_j - x_i) \quad (1)$$

where,  $n$  = the number of data points in the observation series,  $x_i$  and  $x_j$  = values of the data at time  $i$  and  $j$  respectively ( $j > i$ ), and  $\text{sgn}(x_j - x_i)$  is the sign function given by:

$$\text{sgn}(x_j - x_i) = \begin{cases} -1 & \text{for } (x_j - x_i) < 0 \\ 0 & \text{for } (x_j - x_i) = 0 \\ +1 & \text{for } (x_j - x_i) > 0 \end{cases} \quad (2)$$

For large values of  $n$ , the statistic  $S$  tends to normality with mean and variance are given by:

$$E(S) = 0 \quad (3)$$

$$\text{Var}(S) = \frac{n(n-1)(2n+5) - \sum_{p=1}^q t_p(t_p-1)(2t_p+5)}{18} \quad (4)$$

where,  $t_p$  is the number of ties for the  $p^{\text{th}}$  values and  $q$  is the number of tied values.

The standardized test statistic  $Z$  is calculated as:

$$Z = \begin{cases} \frac{S-1}{\sqrt{V(S)}}, & \text{if } S > 0 \\ 0, & \text{if } S = 0 \\ \frac{S+1}{\sqrt{V(S)}}, & \text{if } S < 0 \end{cases} \quad \text{when } n > 10 \quad (5)$$

The standardized test statistic  $Z$  is compared with the standard normal variate at the desired significance level to determine the significance of the trends. Also, the positive values of  $Z$  represent an increasing trend, while the negative values represent a decreasing trend.
